# Supplementary material for: Optimized Method for Untargeted Metabolomics Analysis of MDA-MB-231 Breast Cancer Cells
Source: Metabolites. 2016 Sep 22;6(4):30. doi: 10.3390/metabo6040030 (PMC5192436; doi:10.3390/metabo6040030)
Supplement: Supplementary file 1 [file metabolites-06-00030-s001.pdf]

## Supplementary Materials: Optimized Method for Untargeted Metabolomics Analysis of MDA-MB-231 Breast Cancer Cells

Amanda L. Peterson, Adam K. Walker, Erica K. Sloan and Darren J. Creek

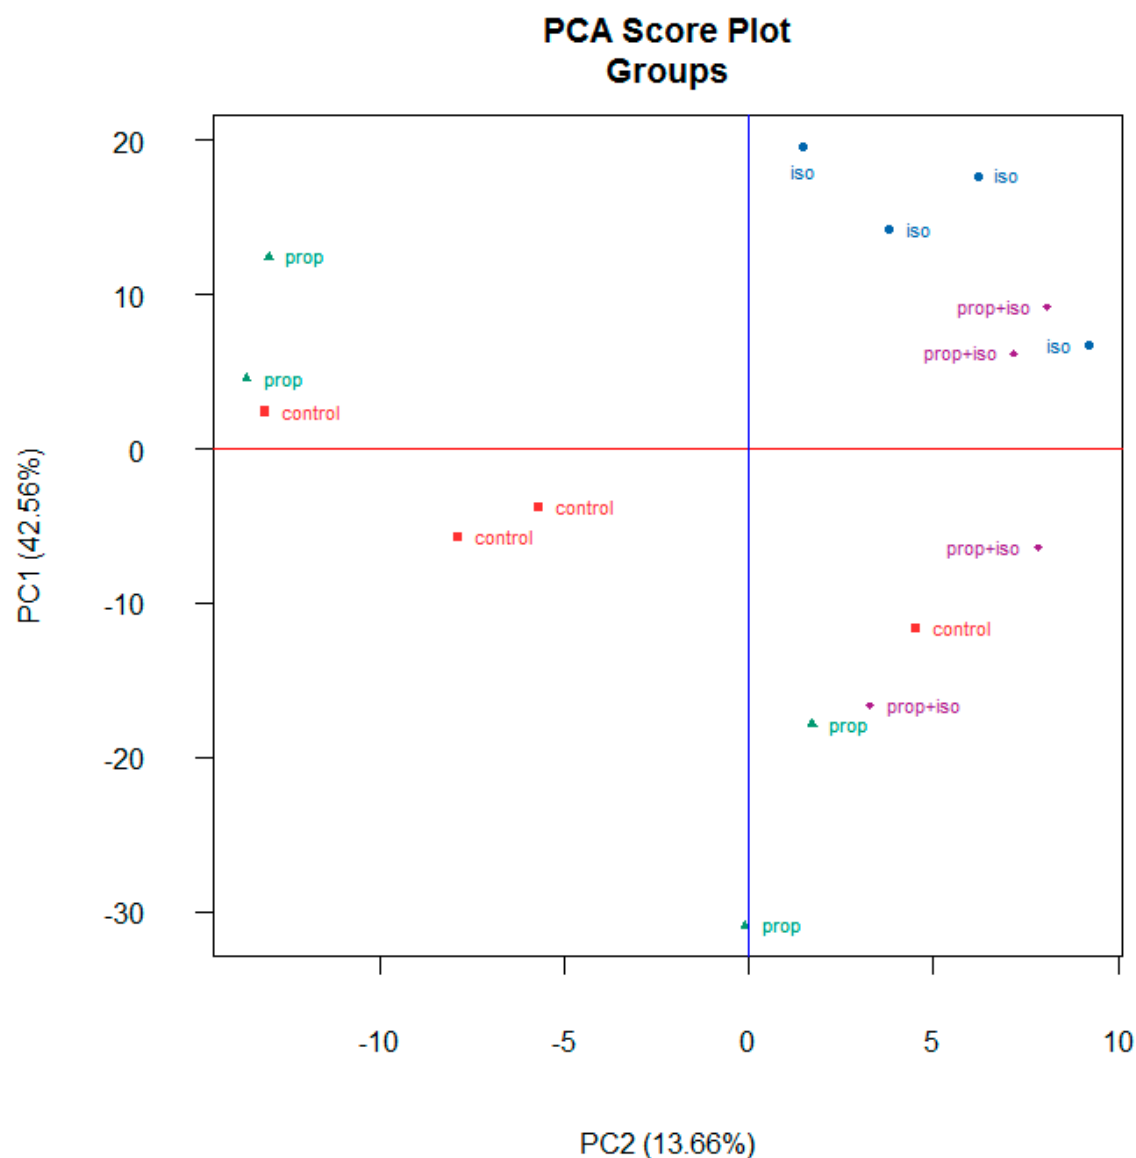

**Figure S1.** Principal components analysis scores plot for the first two principal components from untargeted metabolomics analysis of MDA-MB-231 cells treated for 4 h with isoproterenol (Iso), propranolol (Prop), combination of isoproterenol and propranolol (Prop + Iso) or untreated control cells (control). Values in parenthesis indicate the percentage of variance explained by each principal component.

**Table S1.** Carbon-13 isotope enrichment of metabolites in cultured MDA-MB-231 cells following incubation with 50% U-<sup>13</sup>C-glucose.

| Metabolite                                                                                                  | %Carbons Labelled |     |     |     |     |    |     |     |    |    |    |    |    |    |    |    |    |    |    |
|-------------------------------------------------------------------------------------------------------------|-------------------|-----|-----|-----|-----|----|-----|-----|----|----|----|----|----|----|----|----|----|----|----|
|                                                                                                             | Total             | 0   | 1   | 2   | 3   | 4  | 5   | 6   | 7  | 8  | 9  | 10 | 11 | 12 | 13 | 14 | 15 | 16 | 17 |
| D-Glucose C <sub>6</sub> H <sub>12</sub> O <sub>6</sub>                                                     | 52%               | 44% | 3%  | 0%  | 0%  | 0% | 1%  | 52% |    |    |    |    |    |    |    |    |    |    |    |
| D-Glucose 6-phosphate C <sub>6</sub> H <sub>13</sub> O <sub>9</sub> P                                       | 50%               | 46% | 3%  | 0%  | 3%  | 0% | 1%  | 46% |    |    |    |    |    |    |    |    |    |    |    |
| D-Fructose 6-phosphate C <sub>6</sub> H <sub>13</sub> O <sub>9</sub> P                                      | 44%               | 53% | 4%  | 0%  | 5%  | 0% | 1%  | 37% |    |    |    |    |    |    |    |    |    |    |    |
| D-Fructose 1,6-bisphosphate C <sub>6</sub> H <sub>14</sub> O <sub>12</sub> P <sub>2</sub>                   | 61%               | 36% | 3%  | 0%  | 21% | 1% | 2%  | 37% |    |    |    |    |    |    |    |    |    |    |    |
| D-Glyceraldehyde 3-phosphate C <sub>3</sub> H <sub>7</sub> O <sub>6</sub> P                                 | 36%               | 62% | 2%  | 1%  | 36% |    |     |     |    |    |    |    |    |    |    |    |    |    |    |
| Glycerone phosphate C <sub>3</sub> H <sub>7</sub> O <sub>6</sub> P                                          | 50%               | 48% | 2%  | 1%  | 48% |    |     |     |    |    |    |    |    |    |    |    |    |    |    |
| 3-Phospho-D-glycerate C <sub>3</sub> H <sub>7</sub> O <sub>7</sub> P                                        | 49%               | 49% | 2%  | 1%  | 48% |    |     |     |    |    |    |    |    |    |    |    |    |    |    |
| Phosphoenolpyruvate C <sub>3</sub> H <sub>5</sub> O <sub>6</sub> P                                          | 49%               | 49% | 2%  | 3%  | 46% |    |     |     |    |    |    |    |    |    |    |    |    |    |    |
| (S)-Lactate C <sub>3</sub> H <sub>6</sub> O <sub>3</sub>                                                    | 36%               | 62% | 3%  | 1%  | 35% |    |     |     |    |    |    |    |    |    |    |    |    |    |    |
| 6-Phospho-D-gluconate C <sub>6</sub> H <sub>13</sub> O <sub>10</sub> P                                      | 52%               | 45% | 3%  | 0%  | 7%  | 0% | 2%  | 42% |    |    |    |    |    |    |    |    |    |    |    |
| D-Ribose 5-phosphate C <sub>5</sub> H <sub>11</sub> O <sub>8</sub> P                                        | 71%               | 28% | 3%  | 21% | 22% | 2% | 25% |     |    |    |    |    |    |    |    |    |    |    |    |
| Citrate C <sub>6</sub> H <sub>8</sub> O <sub>7</sub>                                                        | 38%               | 58% | 5%  | 25% | 8%  | 2% | 3%  | 0%  |    |    |    |    |    |    |    |    |    |    |    |
| Isocitrate C <sub>6</sub> H <sub>8</sub> O <sub>7</sub>                                                     | 38%               | 58% | 5%  | 25% | 8%  | 2% | 3%  | 0%  |    |    |    |    |    |    |    |    |    |    |    |
| 2-Oxoglutarate C <sub>5</sub> H <sub>6</sub> O <sub>5</sub>                                                 | 9%                | 86% | 5%  | 7%  | 1%  | 0% | 0%  |     |    |    |    |    |    |    |    |    |    |    |    |
| D-Glutamate C <sub>5</sub> H <sub>9</sub> NO <sub>4</sub>                                                   | 9%                | 86% | 5%  | 7%  | 1%  | 0% | 0%  |     |    |    |    |    |    |    |    |    |    |    |    |
| (S)-Malate C <sub>4</sub> H <sub>6</sub> O <sub>5</sub>                                                     | 15%               | 81% | 4%  | 4%  | 10% | 0% |     |     |    |    |    |    |    |    |    |    |    |    |    |
| L-Aspartate C <sub>4</sub> H <sub>7</sub> NO <sub>4</sub>                                                   | 14%               | 82% | 4%  | 4%  | 10% | 0% |     |     |    |    |    |    |    |    |    |    |    |    |    |
| UDP-N-acetyl-D-glucosamine<br>C <sub>17</sub> H <sub>27</sub> N <sub>3</sub> O <sub>17</sub> P <sub>2</sub> | 27%               | 61% | 13% | 7%  | 3%  | 1% | 2%  | 9%  | 1% | 3% | 0% | 0% | 0% | 0% | 0% | 0% | 0% | 0% | 0% |
| GDP-L-fucose C <sub>16</sub> H <sub>25</sub> N <sub>5</sub> O <sub>15</sub> P <sub>2</sub>                  | 29%               | 59% | 12% | 5%  | 5%  | 0% | 3%  | 15% | 1% | 0% | 0% | 0% | 0% | 0% | 0% | 0% | 0% | 0% |    |
| UDP-glucose C <sub>15</sub> H <sub>24</sub> N <sub>2</sub> O <sub>17</sub> P <sub>2</sub>                   | 67%               | 28% | 5%  | 2%  | 5%  | 1% | 2%  | 48% | 6% | 1% | 1% | 0% | 0% | 0% | 0% | 0% |    |    |    |
| UDP-D-xylose C <sub>14</sub> H <sub>22</sub> N <sub>2</sub> O <sub>16</sub> P <sub>2</sub>                  | 18%               | 71% | 10% | 2%  | 0%  | 0% | 16% | 0%  | 0% | 0% | 0% | 0% | 0% | 0% | 0% |    |    |    |    |
| UDP-glucuronate C <sub>15</sub> H <sub>22</sub> N <sub>2</sub> O <sub>18</sub> P <sub>2</sub>               | 42%               | 49% | 9%  | 3%  | 4%  | 1% | 1%  | 28% | 3% | 1% | 0% | 0% | 0% | 0% | 0% | 0% |    |    |    |
| ATP C <sub>10</sub> H <sub>16</sub> N <sub>5</sub> O <sub>13</sub> P <sub>3</sub>                           | 16%               | 75% | 10% | 6%  | 4%  | 1% | 5%  | 0%  | 0% | 0% | 0% |    |    |    |    |    |    |    |    |
| ADP C <sub>10</sub> H <sub>15</sub> N <sub>5</sub> O <sub>10</sub> P <sub>2</sub>                           | 8%                | 82% | 9%  | 3%  | 3%  | 0% | 3%  | 0%  | 0% | 0% | 0% |    |    |    |    |    |    |    |    |
| Inosine C <sub>10</sub> H <sub>12</sub> N <sub>4</sub> O <sub>5</sub>                                       | 54%               | 41% | 4%  | 16% | 17% | 0% | 21% | 0%  | 0% | 0% | 0% |    |    |    |    |    |    |    |    |
| Guanosine C <sub>10</sub> H <sub>13</sub> N <sub>5</sub> O <sub>5</sub>                                     | 22%               | 70% | 7%  | 7%  | 7%  | 0% | 9%  | 0%  | 0% | 0% | 0% |    |    |    |    |    |    |    |    |
| GTP C <sub>10</sub> H <sub>16</sub> N <sub>5</sub> O <sub>14</sub> P <sub>3</sub>                           | 28%               | 65% | 9%  | 9%  | 7%  | 1% | 9%  | 0%  | 0% | 0% | 0% |    |    |    |    |    |    |    |    |
| O-Acetylcarnitine C <sub>9</sub> H <sub>17</sub> NO <sub>4</sub>                                            | 25%               | 68% | 7%  | 24% | 2%  | 0% | 0%  | 0%  | 0% | 0% |    |    |    |    |    |    |    |    |    |
| O-Butanoylcarnitine C <sub>11</sub> H <sub>21</sub> NO <sub>4</sub>                                         | 42%               | 52% | 7%  | 33% | 3%  | 6% | 0%  | 0%  | 0% | 0% | 0% | 0% |    |    |    |    |    |    |    |
| S-Adenosyl-L-methionine C <sub>15</sub> H <sub>22</sub> N <sub>6</sub> O <sub>5</sub> S                     | 7%                | 79% | 15% | 0%  | 3%  | 0% | 3%  | 0%  | 0% | 0% | 0% | 0% | 0% | 0% | 0% | 0% |    |    |    |
| Succinate C <sub>4</sub> H <sub>6</sub> O <sub>4</sub>                                                      | 3%                | 93% | 5%  | 2%  | 0%  | 0% |     |     |    |    |    |    |    |    |    |    |    |    |    |

**Table S2.** Carbon-13 isotope enrichment of metabolites in cultured MDA-MB-231 cells following incubation with U-<sup>13</sup>C-glutamine.

[illegible]
